# Supplementary material for: Enhancing Pullulan Production in Aureobasidium pullulans through UV Mutagenesis Breeding and High-Throughput Screening System
Source: MDPI journal article supplement (doi:10.3390/fermentation10020103), 2024-02-08
Supplement: s1 [file s1]

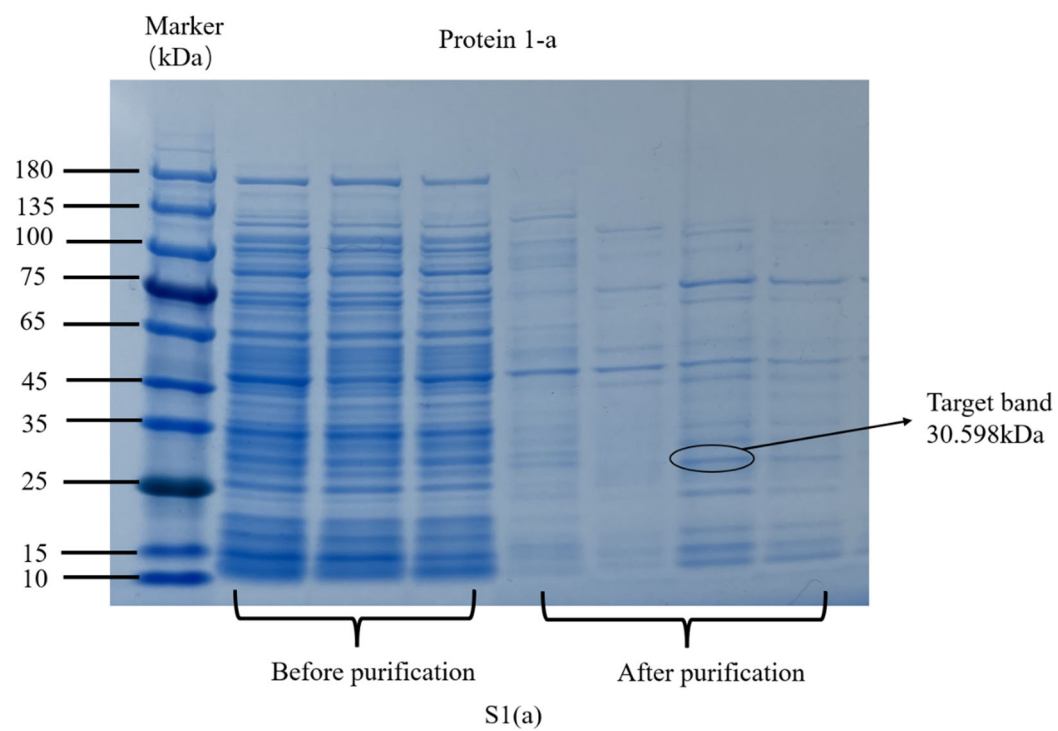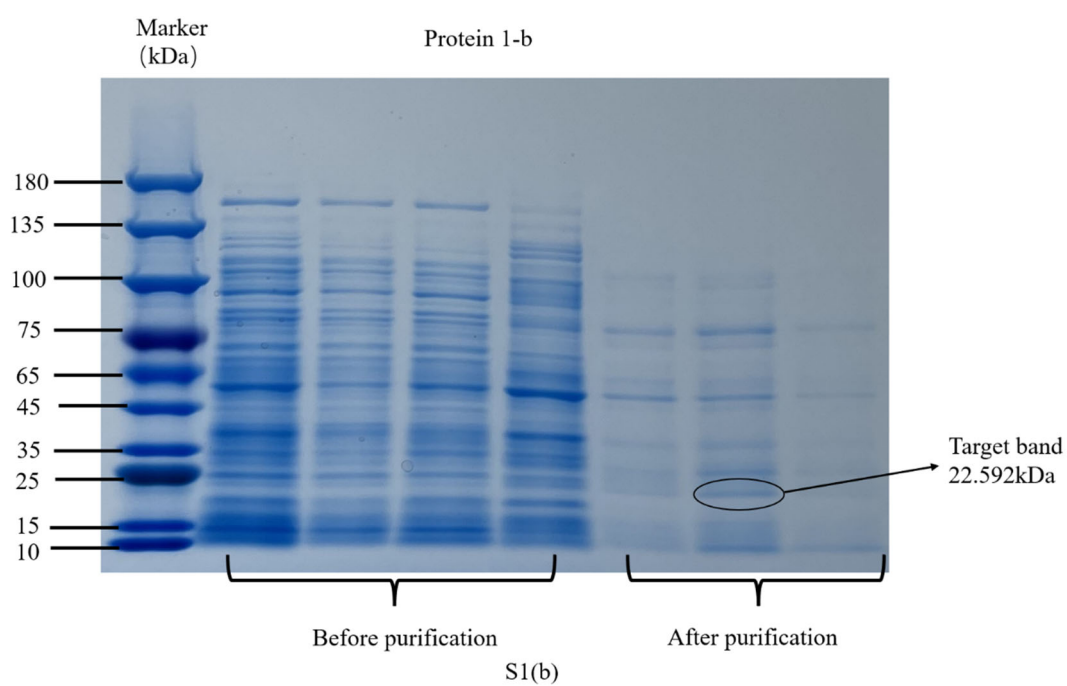

Figure S1. Protein electrophoresis of fluorescent proteins, strains a1(a) and b1(b).

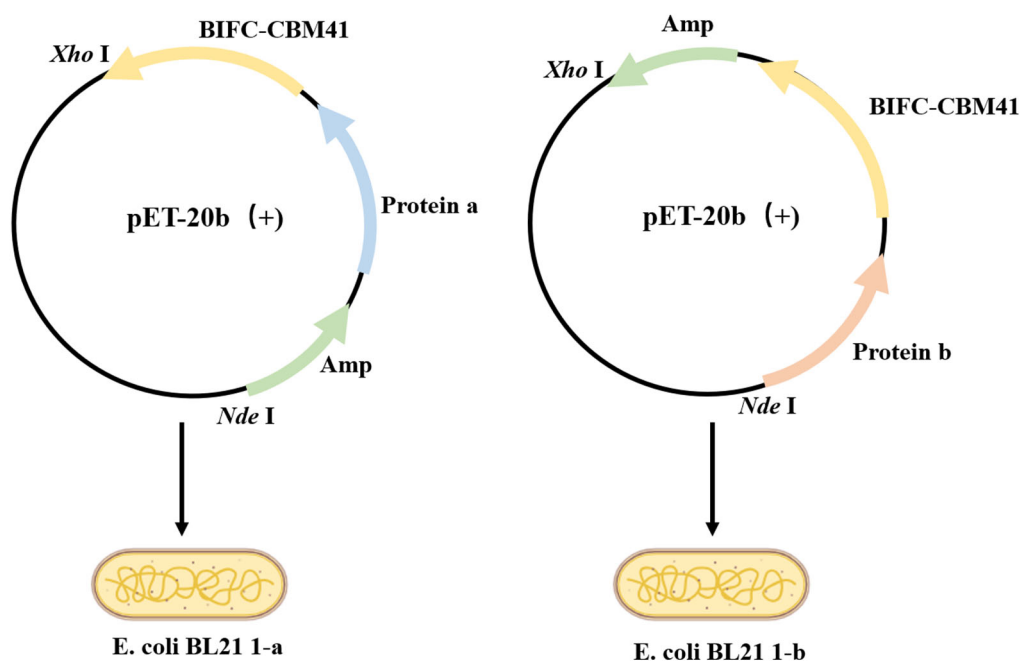

Figure S2. Plasmid map of fluorescent proteins, strains a1 and b1.

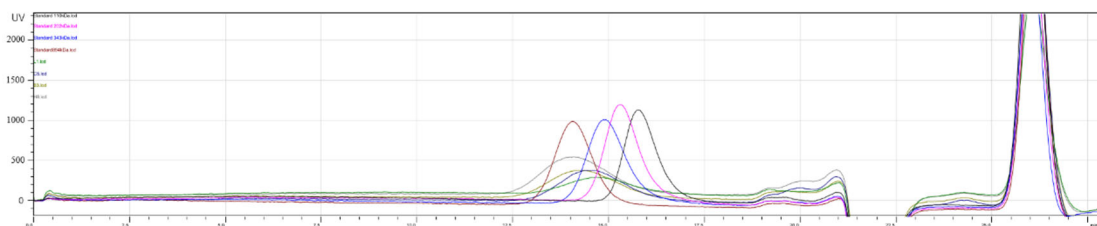

Figure S3. The HPLC result of the standard pullulan samples and the production of the mutated strains in this study.
